postsynaptic currents mediated by gamma-aminobutyric acid(A) receptors in hippocampal neurons. *Mol Pharmacol* 2001; 59:814-24

41. Caraiscos VB, Newell JG, You-Ten KE, Elliott EM, Rosahl TW, Wafford KA, MacDonald JF, Orser BA: Selective enhancement of tonic GABAergic inhibition in murine hippocampal neurons by low concentrations of the volatile anesthetic isoflurane. *J Neurosci* 2004; 24:8454-8

42. Collinson N, Kuenzi FM, Jarolimek W, Maubach KA, Cothliff R, Sur C, Smith A, Otu FM, Howell O, Atack JR, McKernan RM, Seabrook GR, Dawson GR, Whiting PJ, Rosahl TW: Enhanced learning and memory and altered GABAergic synaptic transmission in mice lacking the alpha 5 subunit of the GABAA receptor. *J Neurosci* 2002; 22:5572-80

43. Yee BK, Hauser J, Dolgov VV, Keist R, Mohler H, Rudolph U, Feldon J:

GABA receptors containing the alpha5 subunit mediate the trace effect in aversive and appetitive conditioning and extinction of conditioned fear. *Eur J Neurosci* 2004; 20:1928-36

44. Chambers MS, Atack JR, Broughton HB, Collinson N, Cook S, Dawson GR, Hobbs SC, Marshall G, Maubach KA, Pillai GV, Reeve AJ, MacLeod AM: Identification of a novel, selective GABA(A) alpha5 receptor inverse agonist which enhances cognition. *J Med Chem* 2003; 46:2227-40

45. Whittington MA, Jefferys JG, Traub RD: Effects of intravenous anaesthetic agents on fast inhibitory oscillations in the rat hippocampus *in vitro*. *Br J Pharmacol* 1996; 118:1977-86

46. Singer W: Synchronization of cortical activity and its putative role in information processing and learning. *Annu Rev Physiol* 1993; 55:349-74

## ANESTHESIOLOGY REFLECTIONS

### Long, Wells, Morton, or Jackson?

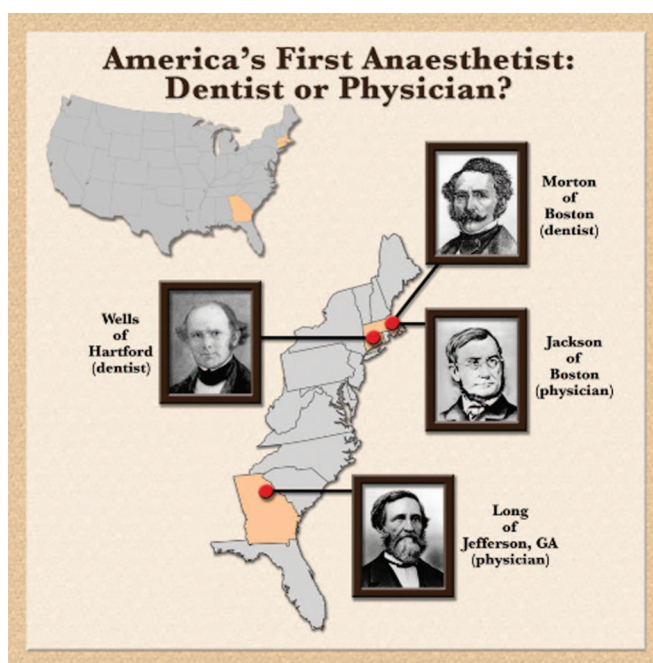

Who was the first "anaesthetist"? Was it pharmacist-physician Crawford W. Long (1815-1878) of Georgia? Or was it dentist Horace Wells (1815-1848) of Connecticut? Or was it perhaps dentist William T. G. Morton (1819-1868) or even geologist-chemist-physician Charles T. Jackson (1805-1880), both of Massachusetts? These are the Americans most frequently cited by the physicians and historians who pursue Wood Library-Museum Fellowships. (Copyright © the American Society of Anesthesiologists, Inc. This image appears in color in the *Anesthesiology Reflections* online collection available at [www.anesthesiology.org](http://www.anesthesiology.org).)

George S. Bause, M.D., M.P.H., *Honorary Curator, ASA's Wood Library-Museum of Anesthesiology, Park Ridge, Illinois, and Clinical Associate Professor, Case Western Reserve University, Cleveland, Ohio. UJYC@aol.com.*
